# Supplementary material for: Controllable p-type doping of monolayer MoS2with tantalum by one-step chemical vapor deposition
Source: Royal Society of Chemistry journal article supplement (doi:10.1039/d2tc01045c), 2022-01-01
Supplement: d2tc01045c1.pdf [file d2tc01045c1.pdf]

## Controllable P-type Doping of Monolayer MoS<sub>2</sub> with Tantalum by One-step Chemical Vapor Deposition

Mengge Li<sup>1</sup>, Xiaoxiang Wu<sup>1</sup>, Wenxuan Guo<sup>1</sup>, Yali Liu<sup>1</sup>, Cong Xiao<sup>1</sup>, Tianjian Ou<sup>1</sup>  
Yuan Zheng<sup>1</sup>, and Yewu Wang<sup>1,2\*</sup>

<sup>1</sup>*Department of Physics, Zhejiang Province Key Laboratory of Quantum Technology and Device & State Key Laboratory of Silicon Materials, Zhejiang University, Hangzhou 310027, P. R. China.*

<sup>2</sup>*Collaborative Innovation Centre of Advanced Microstructures, Nanjing University, Nanjing 210093, P. R. China*

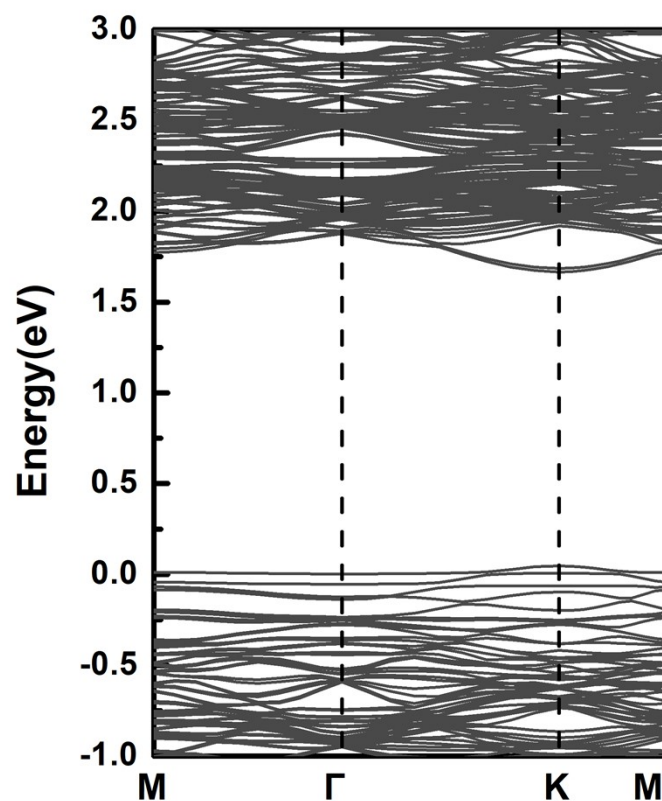

**Figure S1.** The electronic band structure of Ta-doped MoS<sub>2</sub> calculated by PBE with spin-orbit coupling (SOC).

---

\* To whom correspondence should be addressed. E-mail: [yewuwang@zju.edu.cn](mailto:yewuwang@zju.edu.cn).

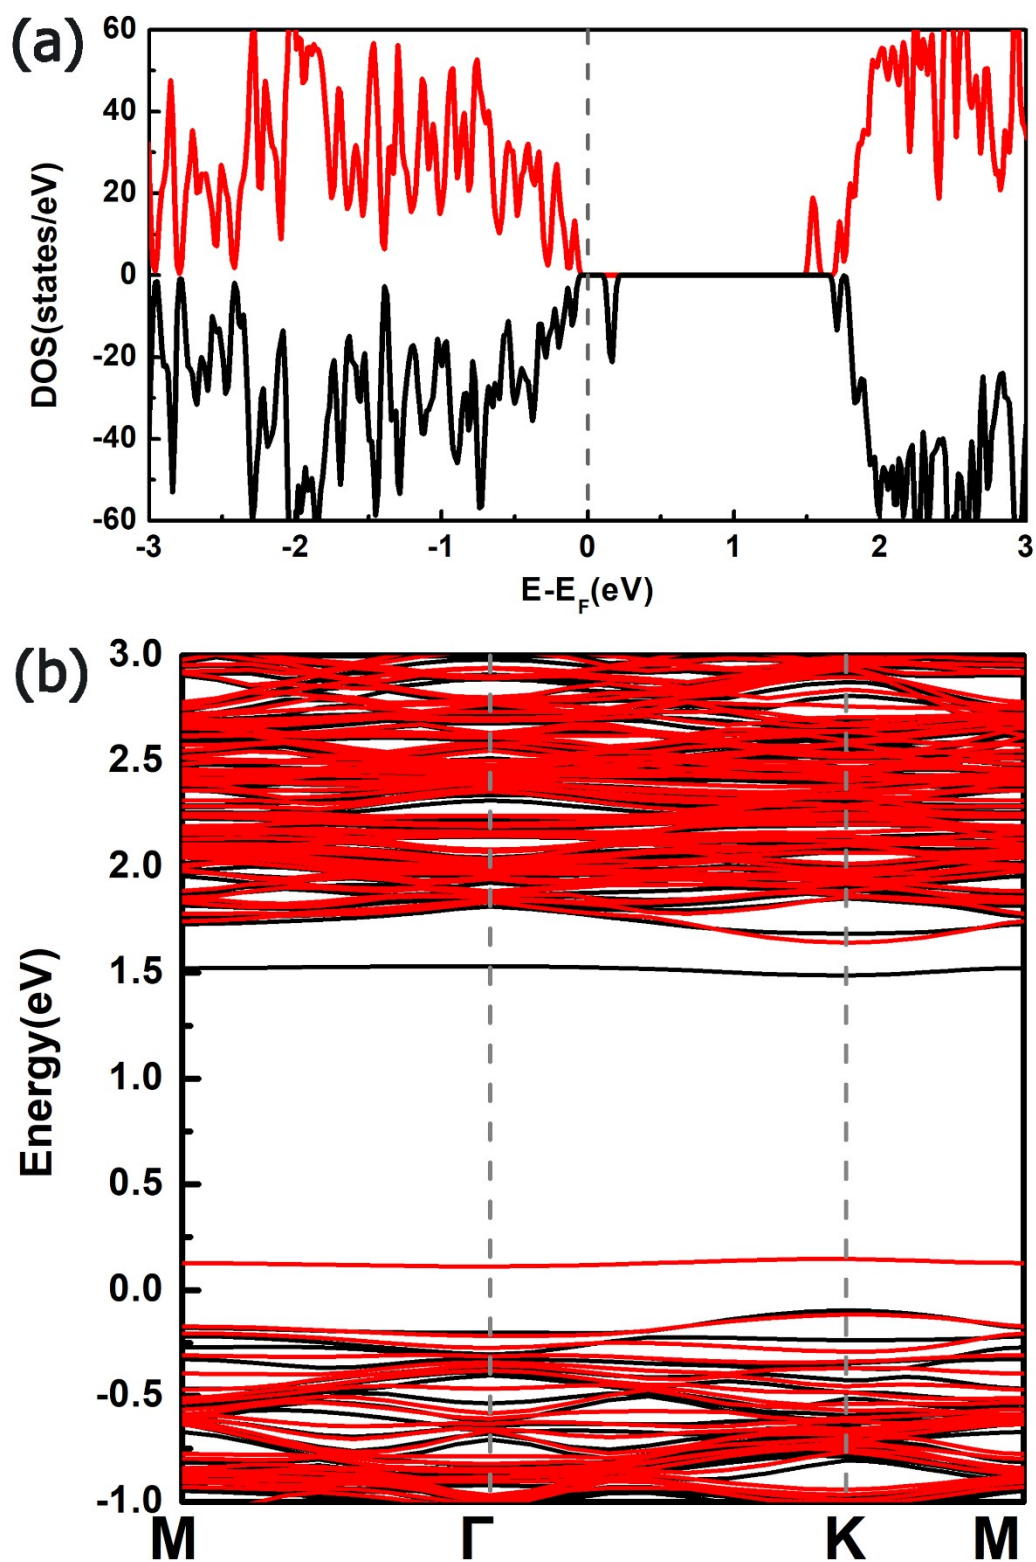

**Figure S2.** The electronic DOS and band structure of Ta-doped MoS<sub>2</sub> calculated by LDA+U functional based on DFT.

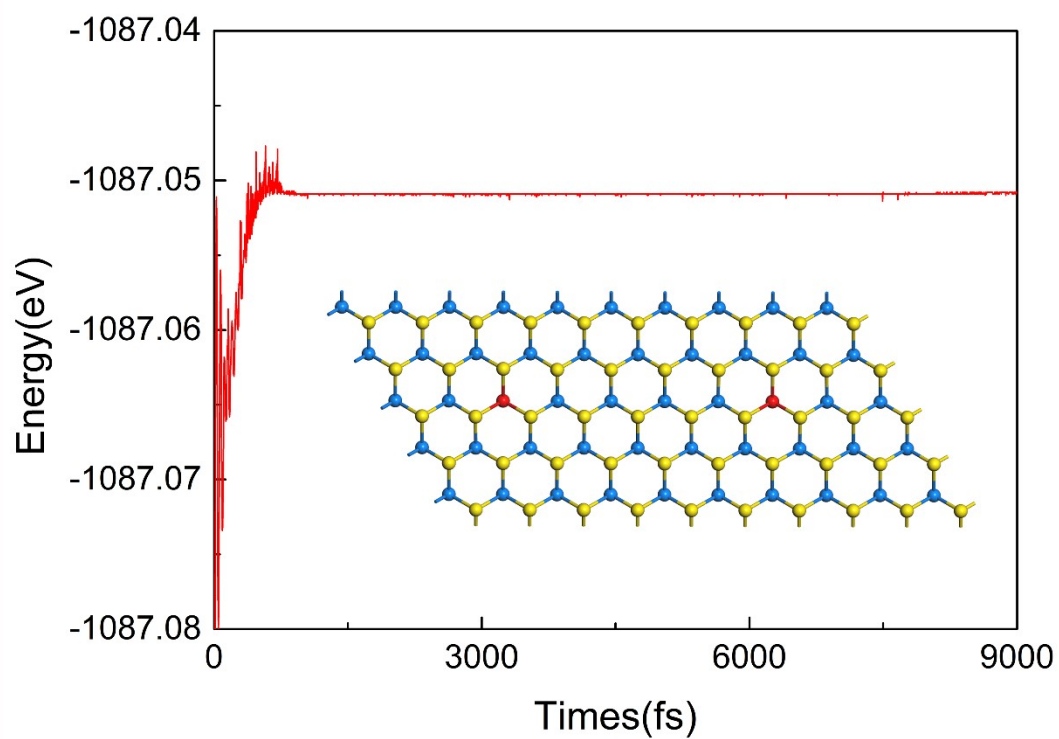

**Figure S3.** The thermodynamic property of Ta-doped MoS<sub>2</sub> calculated by molecular dynamics (MD) based on VASP with Andersen Thermostat set at 300K for the NVT ensemble.
